# Supplementary material
Source: PubMed Central journal article supplement (PMC5033814)
Supplement: jciinsight-1-85911-s001.pdf [file jciinsight-1-85911-s001.pdf]

## Supplementary Figure 1

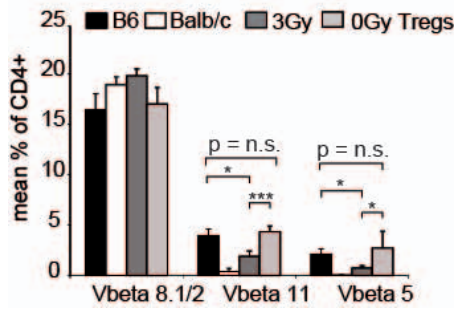

## Supplementary Figure S1

Groups of B6 mice were treated with a costimulation blockade-based BMT protocol and grafted with  $2 \times 10^7$  BALB/c BM cells to induce donor-specific tolerance. BMT recipients received either non-myeloablative (3Gy, n=8, dark grey) irradiation or recipient-derived nTregs (0Gy Tregs, n=6, light grey). Deletion of donor-reactive T cells (correlates to V $\beta$ 11 and V $\beta$ 5 expression; V $\beta$ 8.1/2 serves as nonspecific control) was assessed by flow cytometry of CD4 cells in peripheral blood 4 weeks post BMT. Mean  $\pm$ SD are shown. \*\*\*  $P < 0.0005$ , \*\*  $P < 0.005$ , \*  $P < 0.05$ . 2-tailed  $t$ -test.

**Supplementary Figure 2**

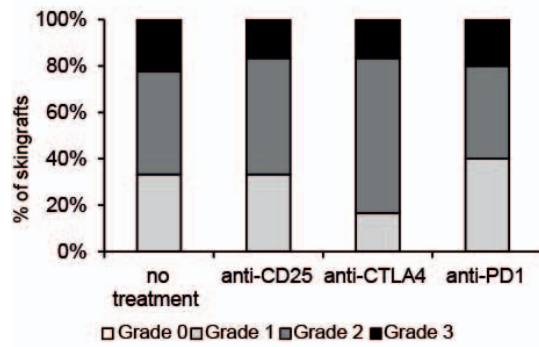

**Supplementary Figure S2**

Long-term tolerant 3Gy chimeras were challenged with anti-CD25mAb, anti-CTLA4mAb or anti-PD1mAb 100d post BMT to assess the impact of Tregs in long-term graft survival in irradiation induced chimeras, (control, n=9; vs anti-CD25, n=6, p=1.000; anti-CTLA4, n=6, p=0.799; vs anti-PD1, n=5, p=1.000; Fisher exact). Data are pooled from 2 independent experiments.
